# Supplementary material for: Relationship between Indoor Living Environment and Housing Prices: A Case Study of the Taojinjiayuan Residential Quarter in Guangzhou, China
Source: Hindawi journal article supplement (doi:10.1155/2023/9984715), 2023-11-23
Supplement: f1 [file 9984715.f1.docx]

***Supplementary Materials***

**Relationship between indoor living environment and housing prices: A case study of the Taojinjiayuan Residential Quarter in Guangzhou, China**

Yang Wang 1, Min Wang 1, *, Yingmei Wu 1, Xiaoli Yue 2, 3, Xueying Li 4, Hong’ou Zhang 2

1 Faculty of Geography, Yunnan Normal University, Kunming, 650500, China
2 Guangzhou Institute of Geography, Guangdong Academy of Sciences, Guangzhou, 510070, China
3 School of Architecture and Urban Planning, Guangdong University of Technology, Guangzhou, 510090, China
4 Guangdong Urban & Rural Planning and Design Institute Co., Ltd., Guangzhou, 510288, China

## Appendix A

Figure S1. Research design


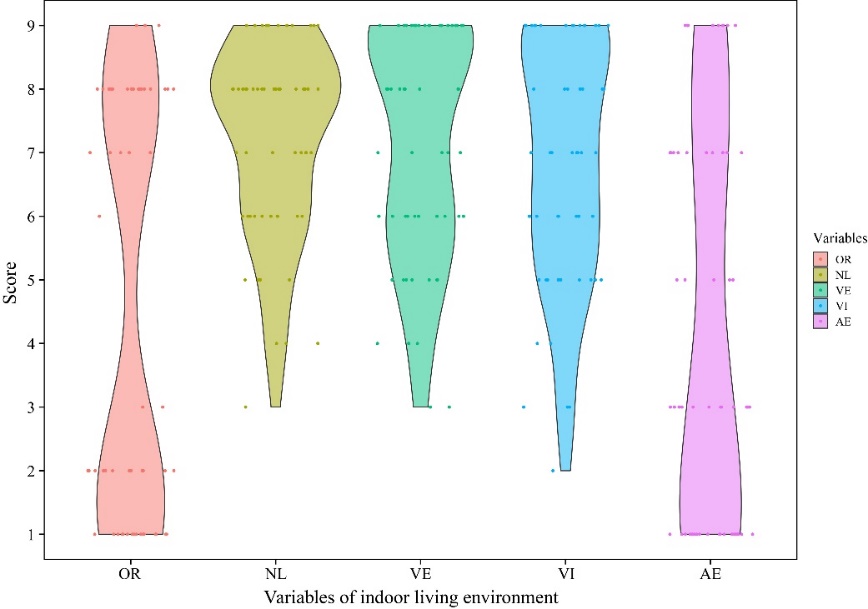


Figure S2. Quantitative evaluation results of ILE


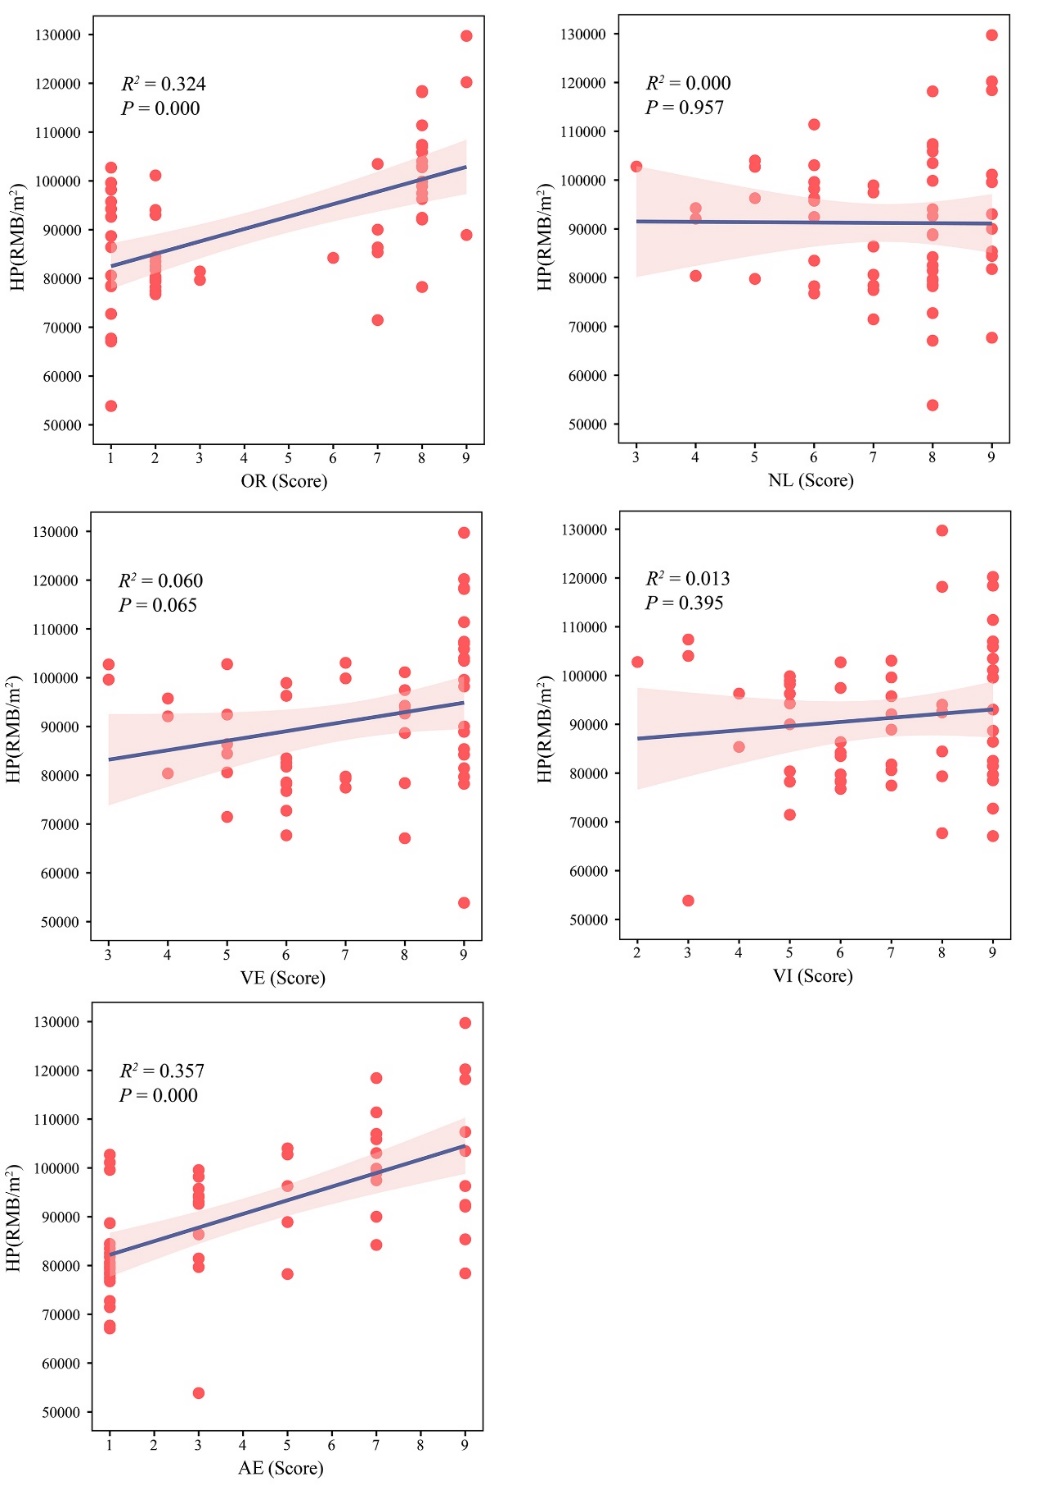


Figure S3. Linear relationship between ILE and housing prices

## Appendix B

The details of the quantitative evaluation scores for the explanatory variables and control variables in Table 1 are as follows.

1. **Orientation**

The orientation of a house determines the sunlight it receives and, to some extent, its ventilation. In general, southern orientation is preferred over a northern orientation, and an eastern orientation is preferred over a western orientation. Points are assigned as follows: nine points for north–south orientation, eight points for south or southeast orientation, seven points for southwest orientation, six points for east–west orientation, five points for east orientation, four points for west orientation, three points for northeast orientation, two points for northwest orientation, and one point for north orientation. The orientation conditions of some houses in the Taojinjiayuan Residential Quarter are as follows (Figure S1).

| 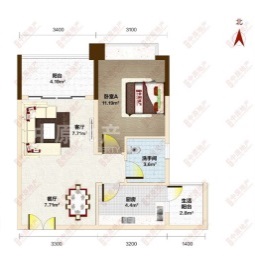 | 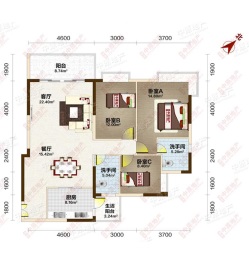 | 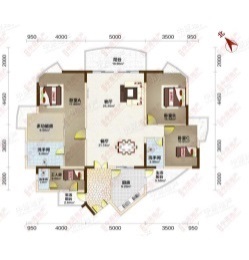 | 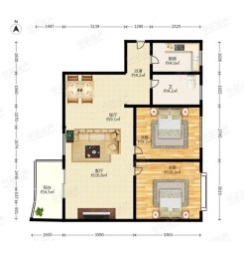 |
| --- | --- | --- | --- |
| North | Northwest | Northeast | West |
| 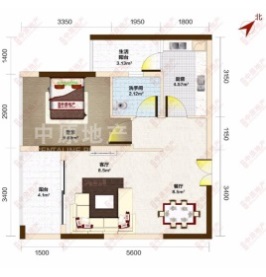 | 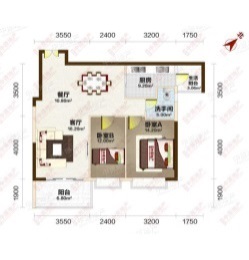 | 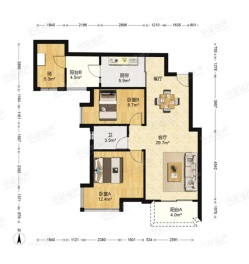 | 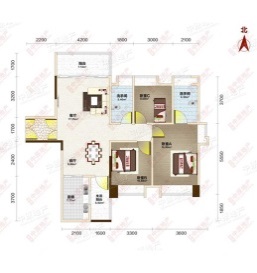 |
| Southwest | Southeast | South | North-south |

Figure S1. Orientation of selected houses in the Taojinjiayuan Residential Quarter

1. **Natural light**

The score for natural light is mainly based on the lighting in the living room and, to a lesser extent, in the bedrooms. Housing with a balcony in the living room is given a base score of five. The height of the building and the view from the balcony affect the natural light, with one point for a floor above the middle level (seven stories) and two points for a floor above the upper level (20 stories). In the case of ideal floor spacing, one point is subtracted if the living room is still blocked by buildings or shade within the field of view; one point is added if the house’s the field of view is not blocked. The number of windows can increase the light or brightness of the house, so one point is added if the living room has both a balcony and windows. Longer living room widths can increase light exposure, but if the living room is too long, it is difficult for light to enter the internal dining room, lowering the quality of the lighting effect. Thus, if the ratio of width to depth of the living room is less than ⅓, one point is subtracted, and if the ratio of width to depth is greater than or equal to ½, one point is added; the maximum score is nine points.

If the living room does not have a balcony, its base score is one point. The main consideration is the natural light in the bedrooms. Two points are added for large single-sided windows in all bedrooms, and one point is added for smaller windows in the rooms. One point is added for a general window in the living room, and no points are added if there are none. One point is added if the floor is seven stories or higher, and two points are added for a floor of 20 stories or higher. In the case of ideal floor spacing, one point is subtracted if the living room is still blocked by buildings or shade within the field of view; one point is added if the house is not blocked within the field of view. The natural light conditions of some houses in the Taojinjiayuan Residential Quarter and their scores are shown below (Figure S2).

| 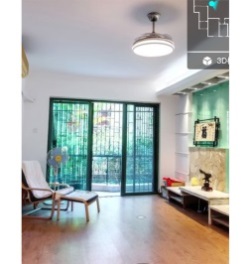 | 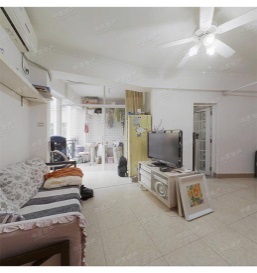 | 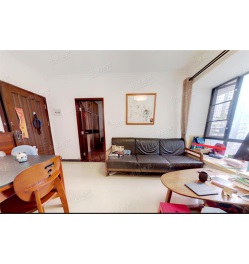 | 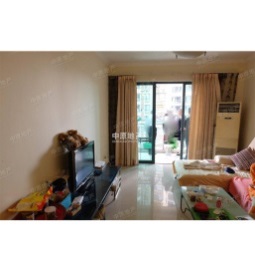 |
| --- | --- | --- | --- |
| 3 points | 4 points | 5 points | 6 points |
| 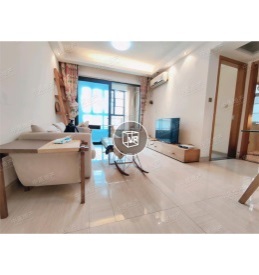 | 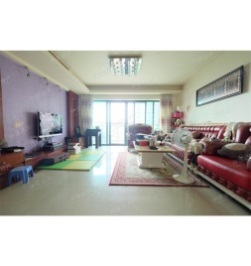 | 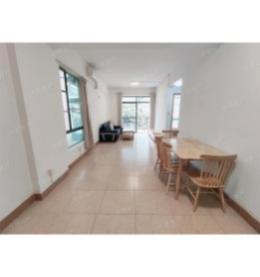 |  |
| 7 points | 8 points | 9 points |  |

Figure S2. Natural light and scores for selected houses in the Taojinjiayuan Residential Quarter

1. **Ventilation**

Ventilation is an essential component that influences the hygiene and comfort of a house. It is measured based on the number of outside walls, combined with the design of the floors and windows. A single-sided orientation is given a base score of three points, a double-sided orientation is given a base score of five points, a double-sided orientation with north-south or east-west ventilation is given a base score of eight points, and a triple-sided orientation is given a base score of nine points. A floor above seven stories is given a base score of one point, a floor above 10 stories is given a base score of two points, and a low floor is given no additional points. A room with both a balcony and a window is given one point. On this basis, one point is added for a larger range of window openings, one point is subtracted for a smaller range, and no points are added or subtracted for a moderate range. Nine points is the maximum score. The ventilation conditions of some houses in the Taojinjiayuan Residential Quarter and their scores are shown below (Figure S3).

| 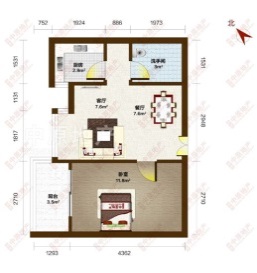 | 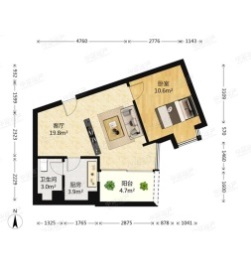 | 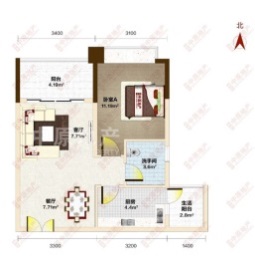 | 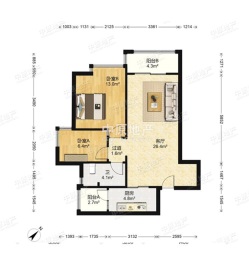 |
| --- | --- | --- | --- |
| 3 points | 4 points | 5 points | 6 points |
| 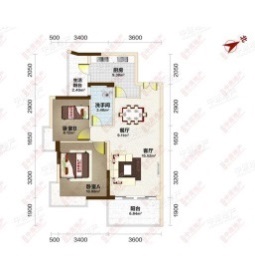 | 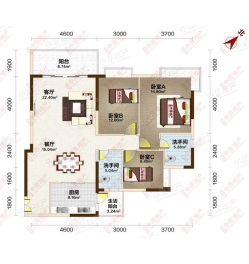 | 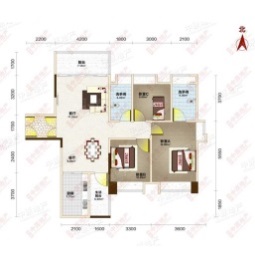 |  |
| 7 points | 8 points | 9 points |  |

Figure S3. Ventilation and scores for selected houses in the Taojinjiayuan Residential Quarter

1. **View**

The rating for the view is generally determined by the distance between trees and buildings or between buildings. Therefore, screening is generally formed by other buildings or trees. Five points is the base score, and the score is reduced according to the degree of impact of the screening on the view. Four points are subtracted for a close distance completely blocked by other buildings or completely blocked by overgrown trees; three points are subtracted for a view that is mostly blocked by the screening and has no view range. Two points are subtracted if there is a certain distance between the screening and the house, but the view is still blocked; and one point is subtracted for a screening with some view space. One point is added for a more open view but limited field of view. An open view with some landscape changes within the field of view is given two points, a wide view with a view of the city’s rich landscape is rated as three points, a visual with a bird’s-eye effect and a view of the city skyline is given four points. The views of some houses in the Taojinjiayuan Residential Quarter and their scores are shown in Figure S4.

| 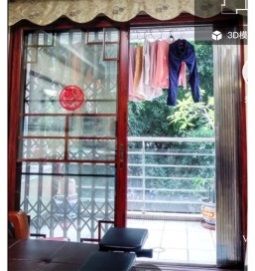 | 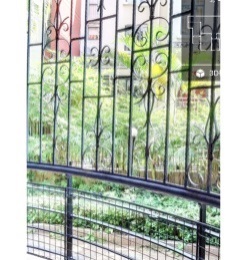 | 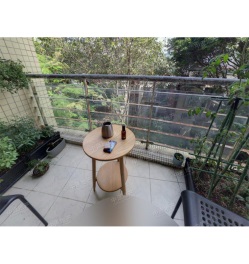 | 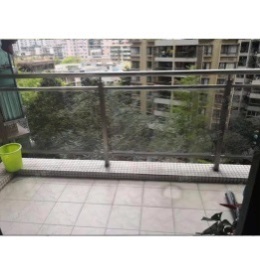 |
| --- | --- | --- | --- |
| 2 points | 3 points | 4 points | 5 points |
| 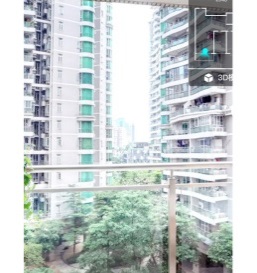 | 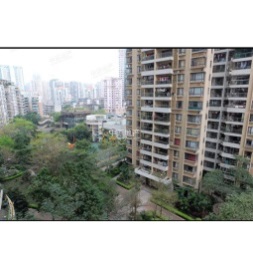 | 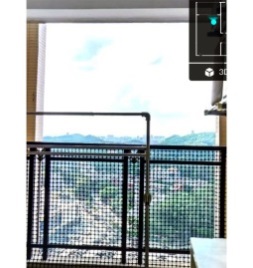 | 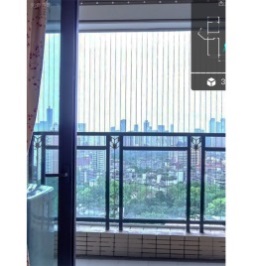 |
| 6 points | 7 points | 8 points | 9 points |

Figure S4. View and scores of selected houses in the Taojinjiayuan Residential Quarter

1. **Acoustic environment**

The noise exposure of a house is evaluated according to the distance of traffic facilities (e.g., railways, elevated roads, streets) from the house. If the housing is adjacent to railways and elevated roads, it is affected more by noise and is assigned one point. If the main orientation of the housing faces railways and elevated roads and is slightly affected by noise, it is assigned three points. If the main orientation of the housing is not affected by noise from railways and elevated roads, but its main orientation faces streets with high traffic and pedestrian flow and is affected by road noise, it is assigned five points. If the main orientation of the housing is not affected by noise from railways and elevated roads, but its main orientation faces a street with low traffic and pedestrian flow and is slightly affected by road noise, it is assigned seven points. If the main orientation of the housing is not affected by noise from traffic facilities, it is assigned nine points. The acoustic environment conditions of some houses in the Taojinjiayuan Residential Quarter are shown in Figure S5.

| 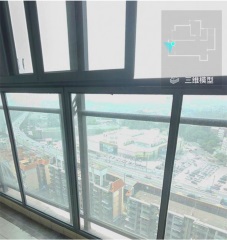 | 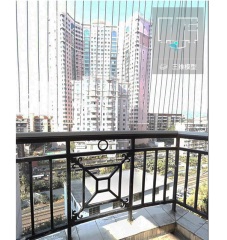 | 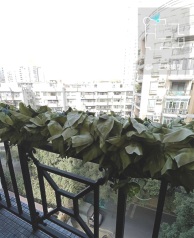 | 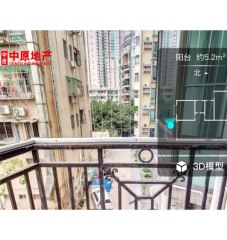 | 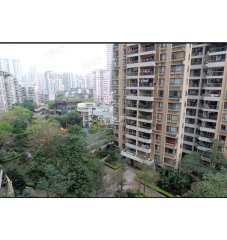 |
| --- | --- | --- | --- | --- |
| Close to the highway | Close to the railroad | Close to noisy streets | Close to ordinary quiet streets | Looking into the garden |

Figure S5. Acoustic environment of selected houses in the Taojinjiayuan Residential Quarter

1. **Floor**

Because the subject of analysis in the residential quarter is elevator housing, the middle and upper floors are relatively well located. The higher the floor is, the better are the view, light, and ventilation. The ninth floor or above is considered a higher floor and is assigned nine points. The first through eighth floors are assigned one to eight points, respectively.

1. **Number of bedrooms**

When the construction area of a house is the same, more bedrooms are often preferred. Points are assigned according to the total number of bedrooms in the house. For example, three points are given to a house with three bedrooms and one point to a house with one bedroom.

1. **Apartment layout**

Six points is the base score for the interior layout of a house. If the overall pattern is square and the space is balanced between length and width, one point is given. If the space is balanced between length and width without too many angles, two points are given. If the overall layout of the house is not square, one point is subtracted. If the overall layout of the house is not square and the room has too many angles and corners, two points are subtracted. In terms of the function of the room’s space, if there is a consideration of the static and dynamic partition or wet and dry separation, one point is added. If neither are considered, one point is subtracted. From the *feng shui* viewpoint (or psychological feeling of a room), each room’s doorway design is considered. If the room and the door of the room are facing each other, the experience is poor, so one point is deducted; no additional points are given if such a situation does not exist. Finally, we consider whether the layout of the room is in line with residents’ living habits. Specifically, the three aspects of evaluation are whether the kitchen is connected to the dining room, the bathroom and kitchen are separated, and the living room is equipped with a large balcony (with sufficient light). If all three conditions are met, one point is added for each. If one of the above conditions is not satisfied, one point is subtracted, and the points are accumulated.

1. **Furnishing**

One point is assigned for unfurnished housing. For houses with furnishing, comprehensive scoring is done according to the degree of newness, soft furnishing (TV wall, storage cabinet, decorative paintings, curtain fabric, and lighting), and decoration style. Four is the base score, plus one point for the overall newness of furnishings. For standard furnishing, no increase or decrease is given. One point is subtracted for housing with older furnishings. If the housing has no soft furnishings or has old decorations, one point is subtracted. One point is added for common styles of decoration design and furnishings, while two points are added for more abundant and exquisite furnishing. For housing with an obvious decoration style (e.g., modern minimalist style, Chinese style, European decoration style), one point is added. Two points are added for more beautiful and stylish decoration.

## Appendix C

The model of the effect of a single ILE factor on HP as:

|  | (1) |
| --- | --- |

where, denotes the housing prices of the TRQ in Guangzhou, the *ith* single ILE characteristic and the *jth* control variable (i.e., the floor where the housing is located, the number of bedrooms, apartment layout, and the furnishing characteristics); , , and are the estimated coefficients of the model and is the model error term.

The integrated ILE effect on HP model as:

|  | (2) |
| --- | --- |

where , , , , and denote housing orientation, natural lighting, ventilation, view, and acoustic environment characteristics, respectively; , , , , and denote the estimated coefficients of ILE factors and the remaining variables are the same as in Equation (1).
